# Supplementary material for: Long COVID Clinical Severity Types Based on Symptoms and Functional Disability: A Longitudinal Evaluation
Source: MDPI journal article supplement (doi:10.3390/jcm13071908), 2024-03-26

**Supplementary Figure S1A. Radar plot for Symptom Severity (on a subset of 359 patients who had A2 assessment before the median time of 12.5 days)**

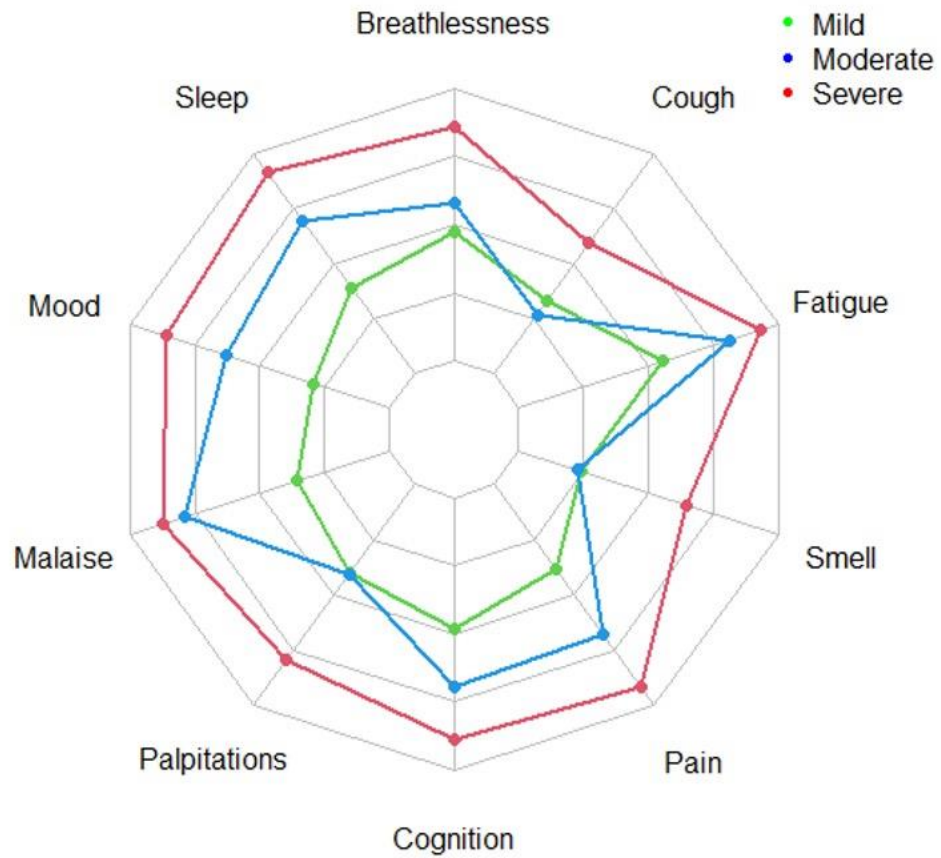

**Supplementary Figure S1B. Radar plot for Functional Disability (on a subset of 359 patients who had A2 assessment before the median time of 12.5 days)**

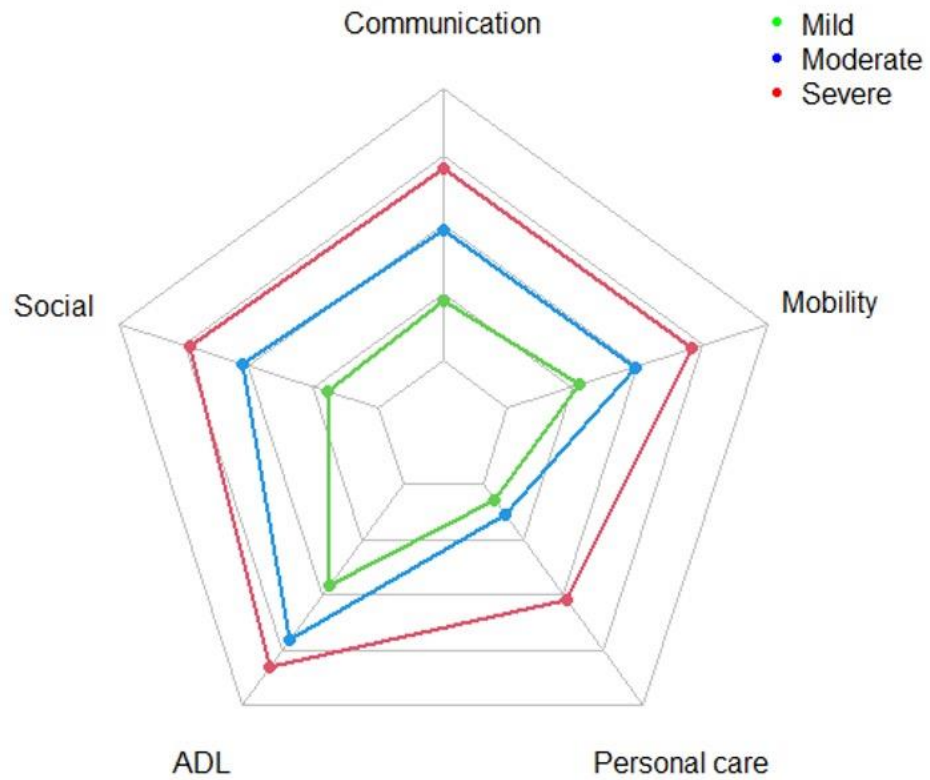

**Supplementary Table S1. Polychoric Factor Structure Symptom Severity – Assessments 1 and 2**

| Assessment 1 – Factor loadings |      | Assessment 2 – Factor Loadings |      |
|--------------------------------|------|--------------------------------|------|
| Breathlessness                 | 0.55 | Breathlessness                 | 0.63 |
| Cough                          | 0.40 | Cough                          | 0.37 |
| Fatigue                        | 0.77 | Fatigue                        | 0.80 |
| Smell                          | 0.41 | Smell                          | 0.46 |
| Pain                           | 0.73 | Pain                           | 0.73 |
| Cognition                      | 0.72 | Cognition                      | 0.79 |
| Palpitations                   | 0.60 | Palpitations                   | 0.63 |
| Malaise                        | 0.68 | Malaise                        | 0.70 |
| Mood                           | 0.66 | Mood                           | 0.71 |
| Sleep                          | 0.74 | Sleep                          | 0.76 |
|                                |      |                                |      |
| Eigenvalue                     | 4.10 | Eigenvalue                     | 4.50 |
| Proportion Variance explained  | 0.41 | Proportion Variance explained  | 0.45 |

**Supplementary Figure S2: Factor Structure – Symptom Severity – Assessments 1 and 2**

2

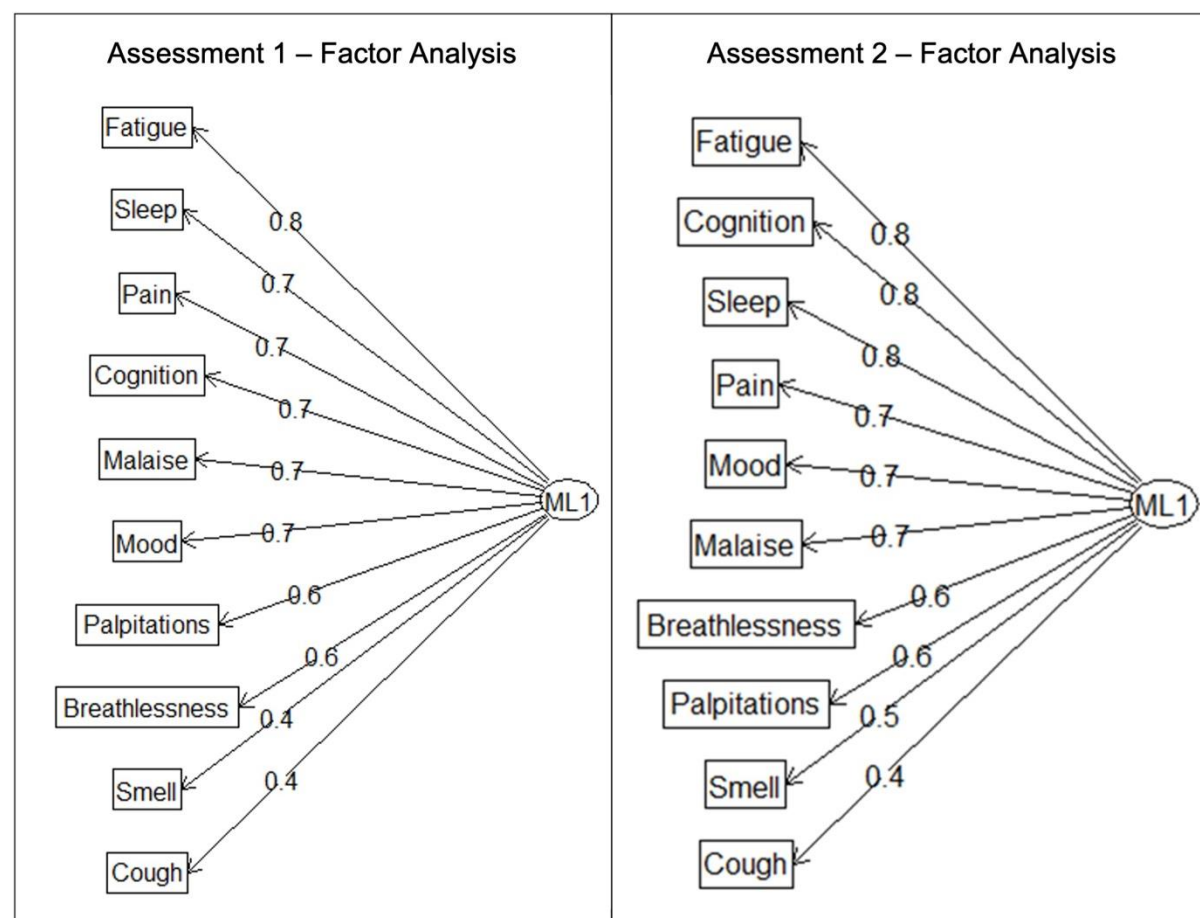

**Supplementary Table S2. Polychoric Factor Analysis – Functional Disability – Assessments 1 and 2**

| Assessment 1 – Factor loadings |      | Assessment 2 – Factor Loadings |      |
|--------------------------------|------|--------------------------------|------|
| Communication                  | 0.54 | Communication                  | 0.63 |
| Social                         | 0.75 | Social                         | 0.79 |
| ADL                            | 0.84 | ADL                            | 0.83 |
| Personal care                  | 0.86 | Personal care                  | 0.86 |
| Mobility                       | 0.83 | Mobility                       | 0.81 |
| Eigenvalue                     | 2.98 | Eigenvalue                     | 3.10 |
| Proportion Variance explained  | 0.60 | Proportion Variance explained  | 0.62 |

*ADL = Activities of Daily Living*

**Supplementary Figure S3. Factor Structure – Functional Disability – Assessments 1 and 2**

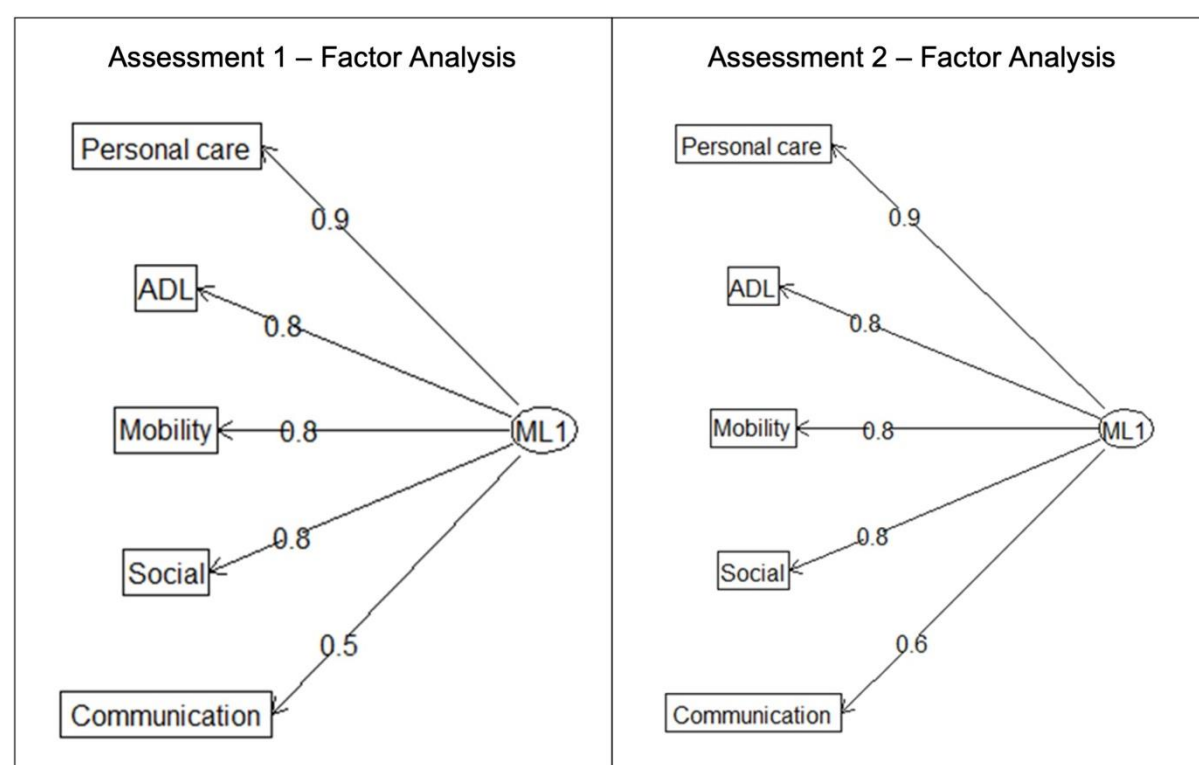

Supplement: s1 [file s1]
